# Supplementary material for: Stranding cases of endangered Ganges river dolphins in the Ghaghara–Sharada irrigation canals, Ganges river basin, India: conservation implications
Source: publisher site journal article supplement (doi:10.1515/mammalia-2019-0110), 2020-08-24
Supplement: Supplementary file 1 [file j_mammalia-2019-0110_suppl.docx]

**Supplementary material**

**Stranding cases of endangered Ganges river dolphins in the Ghaghara-Sharada irrigation canals, northern India: conservation implications**

Shakti Prajapati

DOI 10.1515/mammalia-2019-0110

**Supplementary Table S1:** Some links providing examples of news-based data sources, used to compile information available on stranding of Ganges river dolphins in the Ghaghara-Sharada canals: based on Prajapati (2018). The list includes the major report links that account for most of these cases (21 of 26). Sometimes, news reports carry information on more than 1 case, e.g. while referring to previous instances, so the number of web links provided below need not match the number of cases reported. Some news sources with local coverage did not have online links.

<http://www.thehindu.com/news/national/River-dolphin-is-Indiarsquos-national-aquatic-animal/article16885150.ece>

<https://www.telegraphindia.com/1080509/jsp/nation/story_9246283.jsp>

[https://timesofindia.indiatimes.com/city/lucknow/pregnant-dolphin-rescued-from-Sharada-canal-in-lucknow/articleshow/62234453.cms](https://timesofindia.indiatimes.com/city/lucknow/pregnant-dolphin-rescued-from-sharda-canal-in-lucknow/articleshow/62234453.cms)?

<http://au.whales.org/news/2009/03/india-ganges-river-dolphin-rescued>

<http://www.turtlesurvival.org/blog/1-blog/341-tsa-india-team-aids-in-rescue-of-ganges-river-dolphin#.WnnXBKiWbIV>

<https://www.pressreader.com/india/hindustan-times-lucknow/20160409/281642484328128>

<http://www.indileak.com/efforts-on-to-rescue-two-strayed-gangetic-dolphins/>

<https://www.amarujala.com/uttar-pradesh/barabanki/canal-dolphin>

<https://www.jagran.com/uttar-pradesh/basti-the-dolphins-seen-in-the-sariu-canal-people-looki-18524179.ht>
